# Supplementary material for: Fabrication of a free-standing Ti3C2Tx-PTh counter electrode via interfacial polymerization for dye-sensitized solar cells
Source: PubMed Central journal article supplement (PMC11289875; doi:10.1039/d4ra02651a), 2024-07-31
Supplement: RA-014-D4RA02651A-s001.pdf [file RA-014-D4RA02651A-s001.pdf]

## SUPPLEMENTARY INFORMATIONS

### **Fabrication of a free-standing $Ti_3C_2T_x$ -PTh counter electrode via interfacial polymerization for dye-sensitized solar cells**

Suruthi Priya Nagalingam<sup>a</sup>, Saravanan Pandiaraj<sup>b</sup>, Khalid E. Alzahrani<sup>c</sup>, Abdullah. N Alodhayb<sup>c</sup> and Andrews Nirmala Grace<sup>a\*</sup>

<sup>a</sup> Centre for Nanotechnology Research, Vellore Institute of Technology, Vellore- 632014

<sup>b</sup> Department of Self-Development Skills, King Saud University, Riyadh, 11451, Saudi Arabia.

<sup>c</sup> Department of Physics and Astronomy, College of Science, King Saud University, Riyadh, 11451, Saudi Arabia.

\*Corresponding Author mail: [anirmalagladys@gmail.com](mailto:anirmalagladys@gmail.com)

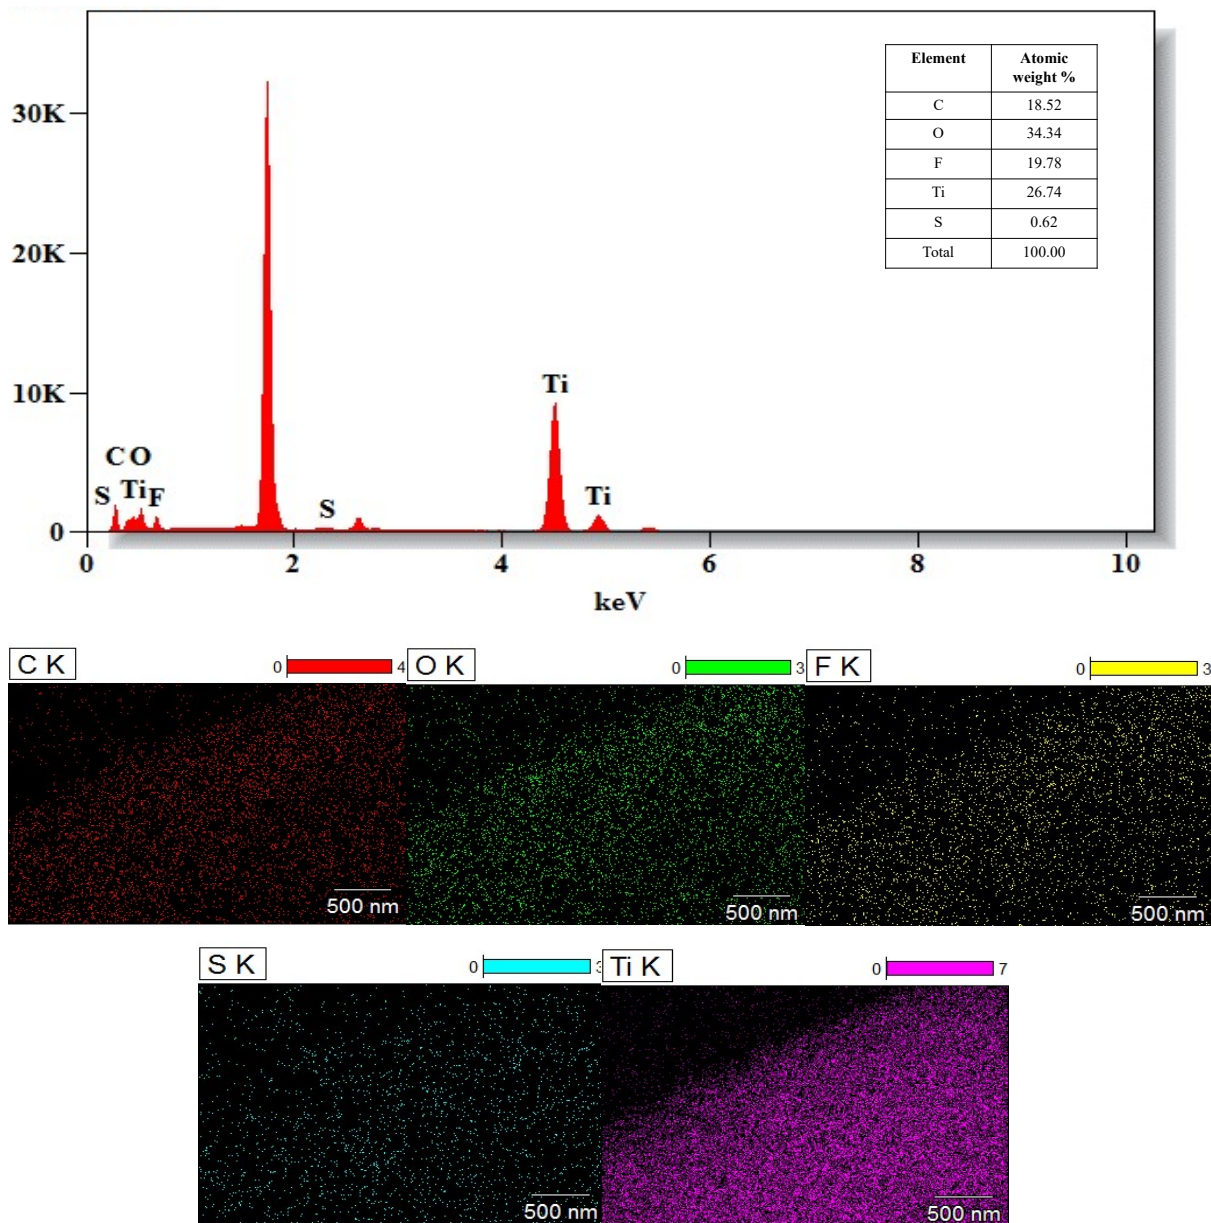

Fig S1. EDS spectrum and elemental mapping of  $Ti_3C_2T_x$ -PTh

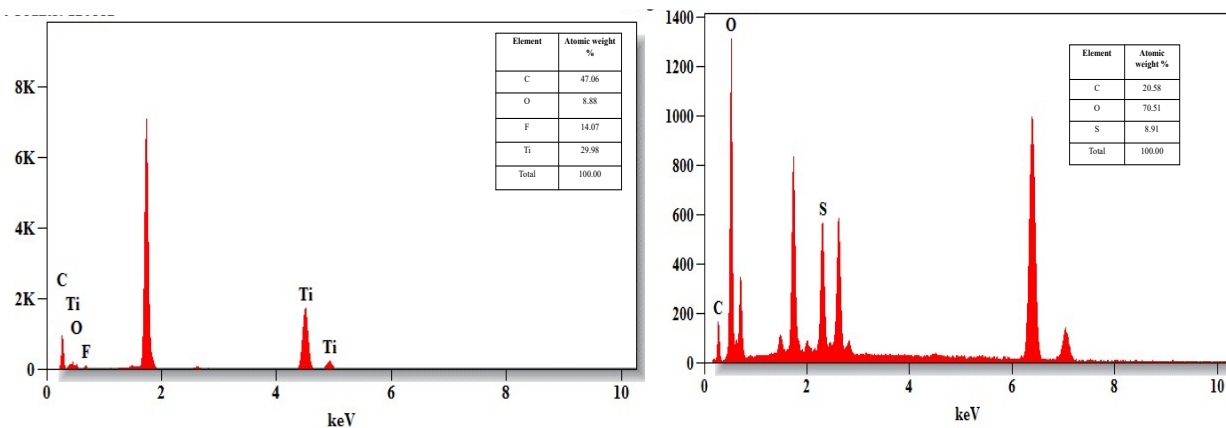

Fig S2. EDS spectrum of pristine PTh and  $Ti_3C_2T_x$

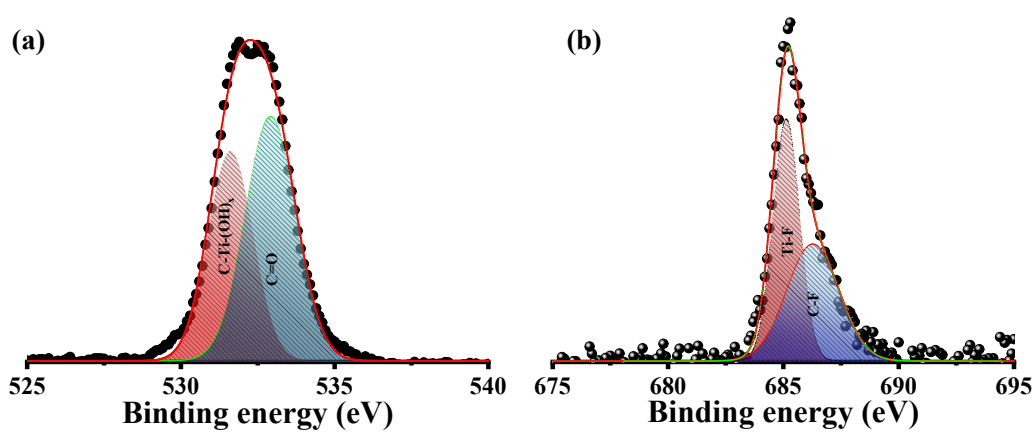

Fig S3. XPS patterns of (a) O 1s and (b) F 1s

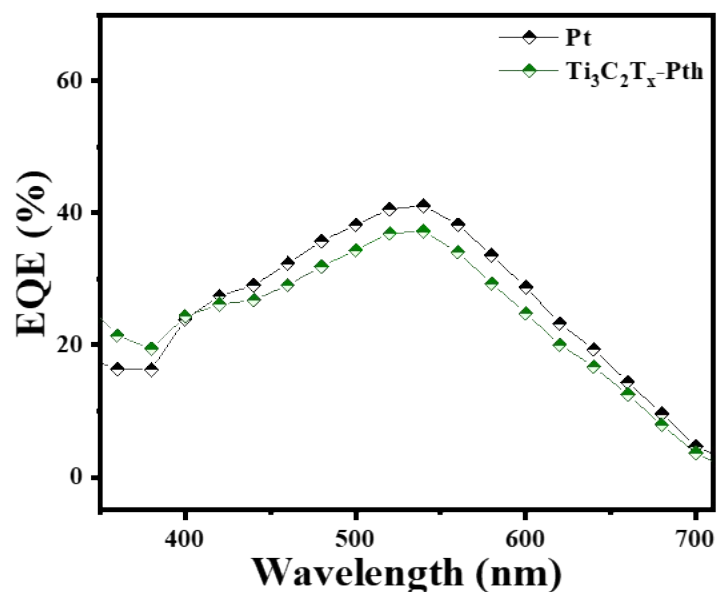

Fig S4. EQE of DSSCs with Pt and  $Ti_3C_2T_x$ -Pth CEs
